# Supplementary material for: Antagonism of Bradykinin B2 Receptor Prevents Inflammatory Responses in Human Endothelial Cells by Quenching the NF-kB Pathway Activation
Source: PubMed Central journal article supplement (PMC3879294; doi:10.1371/journal.pone.0084358), 2014-01-02
Supplement: pone.0084358.s003.pdf [file pone.0084358.s003.pdf]

**Figure S3**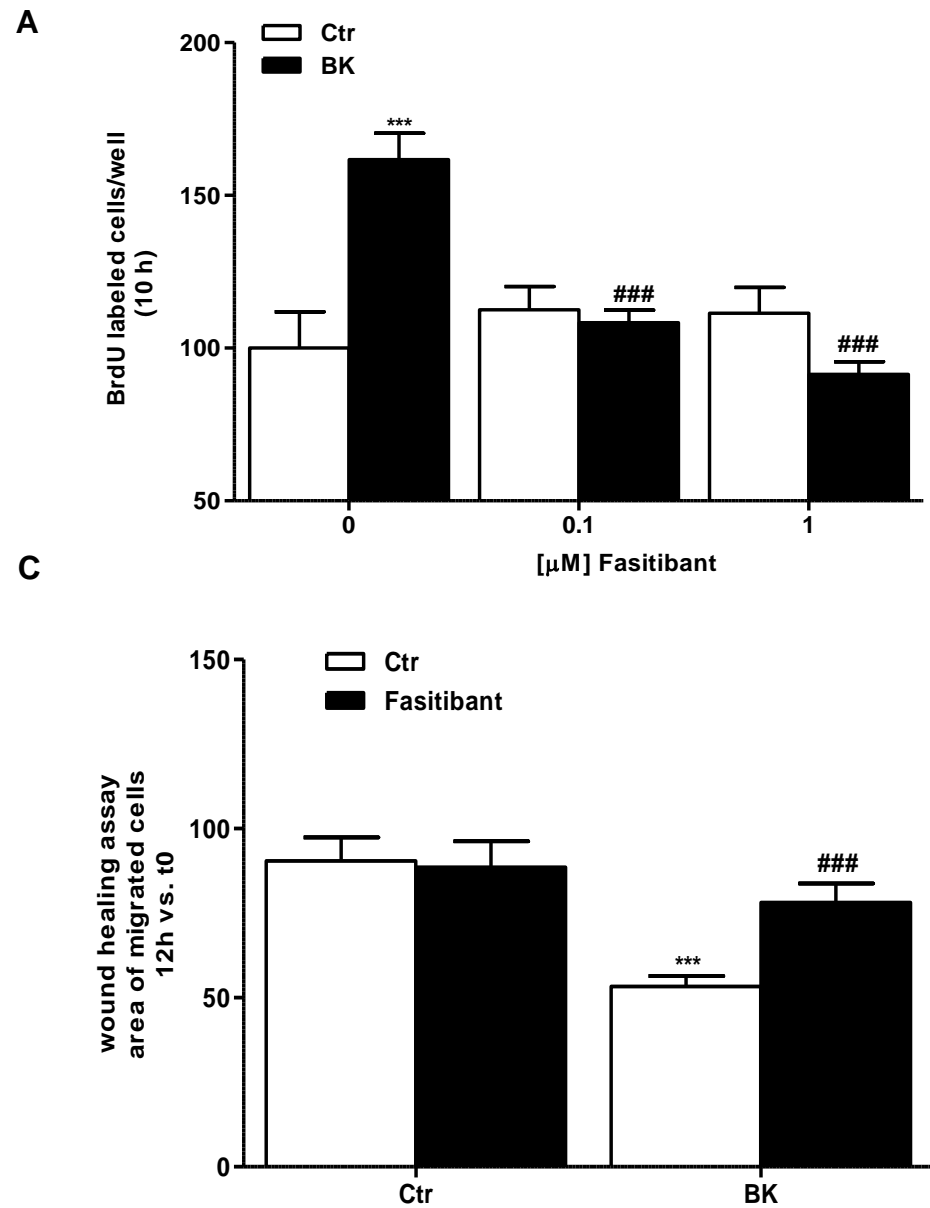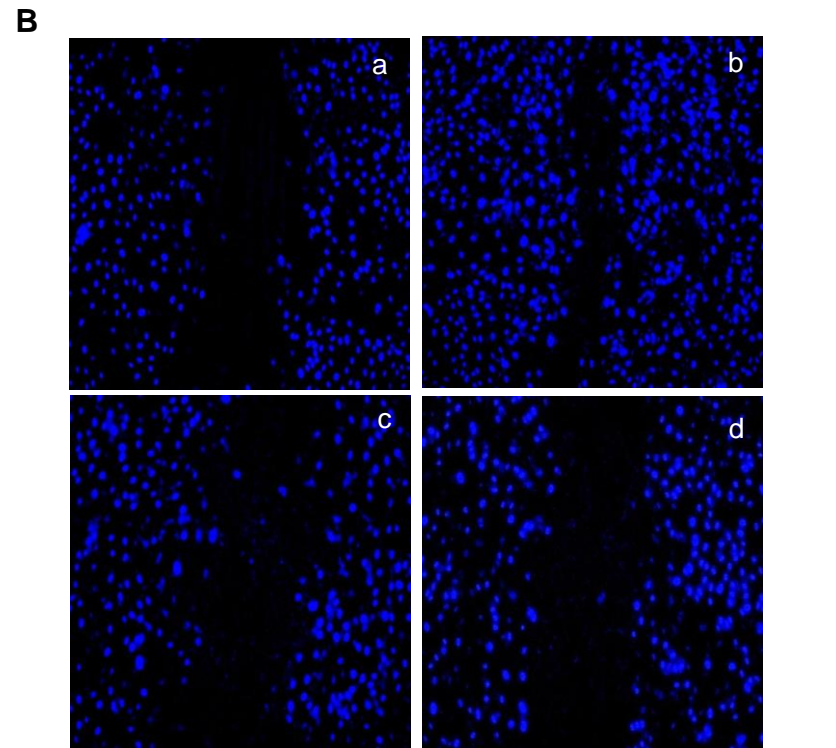

**Figure S3 Fasitibant impairs endothelial cell growth and migration.** (A) Cells were exposed to BK (1  $\mu$ M), or to BK in presence/absence of fasitibant (0.1-1  $\mu$ M) for 10 hrs and growth was evaluated by BrdU incorporation. Data are reported as cell number counted/well. Numbers represent mean  $\pm$  SEM of three experiments run in triplicate. (B) Scratch wound healing assay on HUVEC treated with 0.1% FBS (a), BK (1  $\mu$ M) (b), fasitibant (1  $\mu$ M) (c), fasitibant + BK (d). (C) Quantification of cell migration was reported as area of migrated cells. \*\*\*  $p < 0.001$ , compared to untreated cells; ###  $p < 0.001$  to BK-treated cells. Numbers represent mean  $\pm$  SEM of three experiments run in triplicate.
