# Supplementary material for: Antagonism of Bradykinin B2 Receptor Prevents Inflammatory Responses in Human Endothelial Cells by Quenching the NF-kB Pathway Activation
Source: PubMed Central journal article supplement (PMC3879294; doi:10.1371/journal.pone.0084358), 2014-01-02
Supplement: pone.0084358.s006.pdf [file pone.0084358.s006.pdf]

# Figure S6

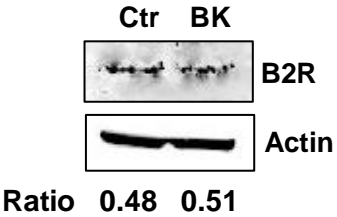

**Figure S6 B2R expression in human circulating proangiogenic cells.** Western blot analysis of B2 receptor in human circulating proangiogenic cells treated with 0.1% FBS (Ctr) or BK (1  $\mu$ M) for 24 h. (Experiments are run three time; n=3). The ratio between B2R over actin is reported.
